# Supplementary material for: pH-Dependent Degradation of Andrographolide. Product Identification, Kinetics, and In Vitro Anti-inflammatory Activity and Cytotoxicity Assessment
Source: Research Square preprint supplement (doi:10.21203/rs.3.rs-6188101/v1), 2025-03-13
Supplement: Supplementary file 1 [file f2c01d0c5bd53d2d937ccc4d.docx]

**pH-Dependent Degradation of Andrographolide. Product Identification, Kinetics, and *In Vitro* Anti-inflammatory Activity and Cytotoxicity Assessment**

Wuttichai Jaidee1, Narawadee Rujanapun1, Kulawadee Malee1, Suchada Chaisawadi2, Panupong Puttarak3,4, Poonsit Hiransai5,6, Geoffrey A. Cordell7, Satyajit D. Sarker8, Lutfun Nahar9, Rawiwan Charoensup1,10*

1 Medicinal Plant Innovation Center of Mae Fah Luang University, Mae Fah Luang University, Chiang Rai 57100, Thailand

2 Pilot Plant Development and Training Institute, King Mongkut’s University of Technology Thonburi, Bangkok 10150, Thailand

3 Phytomedicine and Pharmaceutical Biotechnology Excellence Center, Faculty of Pharmaceutical Sciences, Prince of Songkhla University, Hat-Yai, Songkhla 90110, Thailand

4 Department of Pharmacognosy and Pharmaceutical Botany, Faculty of Pharmaceutical Sciences, Prince of Songkhla University, Hat-Yai, Songkhla 90110, Thailand

5 Center of Excellence in Marijuana, Hemp, and Kratom, Walailak University, Nakhon Si Thammarat 80160, Thailand

6 School of Allied Health Sciences, Walailak University, Nakhon Si Thammarat 80160, Thailand

7 Natural Products Inc., Evanston, IL 60201, USA; Department of Pharmaceutics, College of Pharmacy, University of Florida, Gainesville, FL, 32610, USA

8 Centre for Natural Products Discovery, School of Pharmacy and Biomolecular Sciences, Liverpool John Moores University, Byrom Street, Liverpool L3 3AF, UK

9 Laboratory of Growth Regulators, Palacký University and Institute of Experimental Botany, The Czech Academy of Sciences, Šlechtitelů 27, 78371 Olomouc, Czech Republic

10 School of Integrative Medicine, Mae Fah Luang University, Chiang Rai 57100, Thailand

| **List of Supplementary Materials.** | | **Page** |
| --- | --- | --- |
| Table S1 | Conditions of the Ultra Performance Liquid Chromatography and Mass Spectrometry. | 1 |
| Table S2 | The pH, temperature, and time conditions for the degradation study of andrographolide (**1**). | 1 |
| Table S3 | 1H-NMR Chemical shifts (*δ*) of andrographolide (**1**) and its degradation products **2-6** in MeOH-*d*4. | 2 |
| Table S4 | 13C-NMR of andrographolide (**1**) and its degradation products **2-6** in MeOH-*d*4. | 3 |
| Fig. S1 | HPLC chromatograms of degradation products of andrographolide (**1**) in MeOH at pH 2.0 and 70oC for 0-28 days. | 4 |
| Fig. S2 | HPLC chromatograms of the degradation of andrographolide (**1**) in MeOH at pH 6.0 and 70 oC for 0-5 days. | 5 |
| Fig. S3 | HPLC chromatograms of the degradation of andrographolide (**1**) in MeOH at pH 8.0 and 70oC for 0-4 h. | 6 |
| Fig. S4 | HPLC chromatograms of the reactions of andrographolide (**1**) in DMSO at pH 2.0, pH 8.0, pH 10.0, and pH 12.0 at 70oC. | 7 |
| Fig. S5 | HPLC chromatograms of the chemical degradation of andrographolide (**1**) in MeOH at pH 2.0 and pH 4.0 at 70oC for 7 days. | 8 |
| Fig. S6 | LC-MS-QTOF spectra of enol lactone intermediate in the positive ion mode. | 8 |
| Fig. S7 | HPLC chromatograms of (**A**) compound **6**; (**B**) the reaction of **6** in MeOH at pH 8.0 and 70oC for 4 h; (**C**) the reaction of **1** in MeOH pH 8.0 and 70oC for 4 h. | 9 |
| Fig. S8 | 1H-NMR spectrum of **2** in MeOH-*d*4 at 500 MHz | 9 |
| Fig. S9 | 13C NMR spectrum of **2** in MeOH-*d*4 at 500 MHz. | 10 |
| Fig. S10 | LC-MS-QTOF positive mode of **2** | 10 |
| Fig. S11 | 1H-NMR spectrum of **3** in MeOH-*d*4 at 500 MHz | 11 |
| Fig. S12 | 13C NMR spectrum of **3** in MeOH-*d*4 at 500 MHz. | 11 |
| Fig. S13 | LC-MS-QTOF positive mode of **3** | 12 |
| Fig. S14 | 1H-NMR spectrum of **4** in MeOH-*d*4 at 500 MHz | 12 |
| Fig.S15 | 13C NMR spectrum of **4** in MeOH-*d*4 at 500 MHz. | 13 |
| Fig. S16 | LC-MS-QTOF positive mode of **4** | 13 |
| Fig. S17 | 1H-NMR spectrum of **5** in MeOH-*d*4 at 500 MHz | 14 |
| Fig. S18 | 13C-NMR spectrum of **5** in MeOH-*d*4 at 500 MHz | 14 |
| Fig. S19 | LC-MS-QTOF positive mode of **5.** | 15 |
| Fig. S20 | 1H-NMR spectrum of **6** in MeOH-*d*4 at 500 MHz | 15 |
| Fig. S21 | 13C-NMR spectrum of **6** in MeOH-*d*4 at 500 MHz | 16 |
| Fig. S22 | LC-MS-QTOF positive mode of **6.** | 16 |
| References |  | 17 |

**Table S1** Conditions of the Ultra Performance Liquid Chromatography and Mass Spectrometry.

| **Ultra Performance Liquid Chromatography condition** | |
| --- | --- |
| Mobile phase A | 0.1% formic acid in H2O |
| Mobile phase B | MeOH |
| Mobile Phase Ratio | 60:40 A:B |
| Column | Poroshell EC C-18, 150 x 2.1 mm, 2.7 µm |
| Flow rate | 0.2 mL/min |
| Run time | 45 min |
| Column temperature | 35 oC |
| Injection volume | 1.0 µL |
|  |  |
| **Mass Spectrometry parameter** | |
| Source Parameters | |
| Ionization mode | Positive |
| Gas Temp (°C) | 300 |
| Gas Flow (L/min) | 11 |
| Nebulizer (psig) | 45 |
| Scan Source Parameters | |
| VCap | 3500 |
| Fragmentor | 135 |
| Skimmer1 | 65 |
| OctopoleRFPeak | 750 |

**Table S2** The pH, temperature, and time conditions for the degradation study of andrographolide (**1**).

| Solution | | | | | |
| --- | --- | --- | --- | --- | --- |
| pH 2.0 | | pH 6.0 | | pH 8.0 | |
| Temp. (oC) | Time (day) | Temp. (oC) | Time (day) | Temp. (oC) | Time (h) |
| 70 | 0, 6, 14, 22, 28, 35 | 60 | 0, 1, 4, 5, 6, 7, 8, 11 | 50 | 0, 0.5, 1, 1.5, 2, 2.5, 3, 3.5 |
| 77 | 0, 6, 9, 12, 16, 18 | 70 | 0, 1, 4, 5, 6, 7, 8, 11 | 60 | 0, 0.5, 1, 1.5, 2, 2.5, 3, 3.5 |
| 85 | 0, 3, 7, 9, 11, 13 | 80 | 0, 1, 4, 5, 6, 7, 8, 11 | 70 | 0, 0.5, 1, 1.5, 2, 2.5, 3, 3.5 |

**Table S3** 1H-NMR Chemical shifts (*δ*) of andrographolide (**1**) and its degradation products **2-6** in MeOH-*d*4.

| **No.** | **1**1 | **2**2 | **3**1 | **4**1 | **5**3 | **6**1 |
| --- | --- | --- | --- | --- | --- | --- |
| 3 | 3.41, t (8.2) | 3.37, dd (11.6,4.6) | 3.41, m | 3.40, t (8.0) | 3.40, m | 3.40, dd (11.1, 7.0) |
| 7 | 2.43, dt (12.7, 3.4) | 1.96, m | 2.0-2.1, m | 2.42, brd (14.1) | 2.43, m | 2.45, ddd (13.5, 4.2, 2.3) |
|  | 2.04, td (12.7, 4.6) | - | - | 2.03, td (14.1, 5.0) | 2.02, m | 2.04, m |
| 9 | 1.92, dd (10, 3.4) | 1.51, m | - | 1.86, m | 1.90, brd, (11.1) | 2.38 d, (10.1) |
| 11 | 2.60, m | 2.26, dd (11.6, 6.9) | 3.00, dd (17.7, 8.4) | 2.37, td (9.8, 6.3) | 2.40, m | 6.86, d (15.8, 10.1) |
|  | - | 2.17, m | 3.28, dd (17.7, 5.0) | 2.58, br.d (9.8) | 2.25, m |  |
| 12 | 6.85, td (6.7, 1.3) | 4.67, dd (9.3,6.9) | 6.71, ddd (7.6, 1.8) | 6.80, t (6.3) | 6.63, m | 6.16, d (15.8) |
| 14 | 5.01, d (6.0) | 7.40, m | 5.03, d (6.0) | 4.69, br.t (5.2) | 2.67, m | 7.44, t (2.0) |
|  |  |  |  |  | 3.09, m |  |
| 15 | 4.16, dd (10.2, 1.9) | 4.82, brs | 4.23, d (10.4) | 3.75, dd (11.0, 6.7) | 5.55 dd (6.4, 2.1) | 4.87, s |
|  | 4.46, dd (10.2, 6.0) | 4.84, brs | 4.49, dd (10.3, 6.0) | 3.61, dd (11.0, 5.6) |  | - |
| 17 | 4.67, s | 1.16, s | 1.61, s | 4.50, s | 4.48, brs | 4.50, d (1.7) |
|  | 4.89, s | - | - | 4.90, s | overlapped | 4.76, d (1.7) |
| 18 | 1.22, s | 1.20, s | 1.22, s | 1.21, s | 1.22, s | 1.23, s |
| 19 | 4.12, d (11.2) | 4.03, d (11.2, 2.3) | 4.18, d (11.0) | 4.12, d (11.1) | 4.12, d (11.1) | 4.13, d (11.1) |
|  | 3.37, d (11.2) | 3.50, d (11.2) | 3.50, d (11.1) | 3.36, d (11.1) | 3.36, d (11.1) | 3.39, d (11.1) |
| 20 | 0.75, s | 0.90, s | 1.01, s | 0.75, s | 0.74, s | 0.84, s |
| 21 | - | - | - | - | 3.50, s | - |
| **1**: Andrographolide  **2**: Isoandrographolide  **3**: 9-Dehydro-17-hydro-andrographolide  **4**: 15-*seco*-Andrographolide  **5**: 14-Deoxy-15-methoxyandrographolide  **6**: 14-Deoxy-11,14-dehydroandrographolide | | | | | | |

**Table S4** 13C-NMR of andrographolide (**1**) and its degradation products **2-6** in MeOH-*d*4.

| **No.** | **1**1 | **2**2 | **3**1 | **4**1 | **5**3 | **6**1 |
| --- | --- | --- | --- | --- | --- | --- |
| 1 | 38.2 | 36.8 | 35.3 | 38.1 | 38.1 | 37.8 |
| 2 | 29.1 | 28.1 | 28.2 | 29.0 | 29.0 | 28.9 |
| 3 | 81.0 | 81.0 | 81.3 | 80.9 | 80.9 | 81.2 |
| 4 | 43.7 | 43.6 | 42.8 | 43.7 | 43.7 | 43.8 |
| 5 | 56.5 | 57.6 | 51.9 | 56.4 | 56.3 | 55.8 |
| 6 | 25.2 | 21.7 | 19.7 | 25.2 | 25.2 | 23.3 |
| 7 | 39.0 | 41.1 | 37.5 | 39.1 | 38.9 | 39.5 |
| 8 | 148.8 | 83.2 | 129.2 | 148.9 | 149.0 | 150.1 |
| 9 | 57.5 | 59.3 | 134.9 | 57.9 | 56.9 | 62.8 |
| 10 | 40.0 | 38.9 | 38.9 | 40.0 | 39.9 | 39.6 |
| 11 | 25.8 | 30.1 | 28.6 | 24.5 | 26.6 | 136.5 |
| 12 | 149.3 | 72.3 | 150.4 | 149.3 | 143.6 | 122.5 |
| 13 | 129.8 | 137.0 | 128.9 | 129.8 | 125.5 | 129.6 |
| 14 | 66.7 | 148.4 | 66.7 | 71.4 | 33.5 | 146.7 |
| 15 | 76.1 | 71.9 | 76.2 | 66.3 | 104.4 | 71.6 |
| 16 | 172.6 | 174.9 | 172.3 | 172.6 | 171.8 | 174.8 |
| 17 | 109.1 | 29.6 | 20.9 | 108.9 | 108.5 | 109.1 |
| 18 | 23.4 | 23.4 | 20.2 | 23.4 | 23.3 | 24.4 |
| 19 | 65.0 | 64.8 | 64.9 | 65.0 | 64.9 | 65.0 |
| 20 | 15.5 | 15.8 | 15.6 | 15.6 | 15.5 | 16.3 |
| 21 |  |  |  |  | 57.2 |  |
| **1**: Andrographolide  **2**: Isoandrographolide  **3**: 9-Dehydro-17-hydro-andrographolide  **4**: 15-*seco*-Andrographolide  **5**: 14-Deoxy-15-methoxyandrographolide  **6**: 14-Deoxy-11,14-dehydroandrographolide | | | | | | |

**
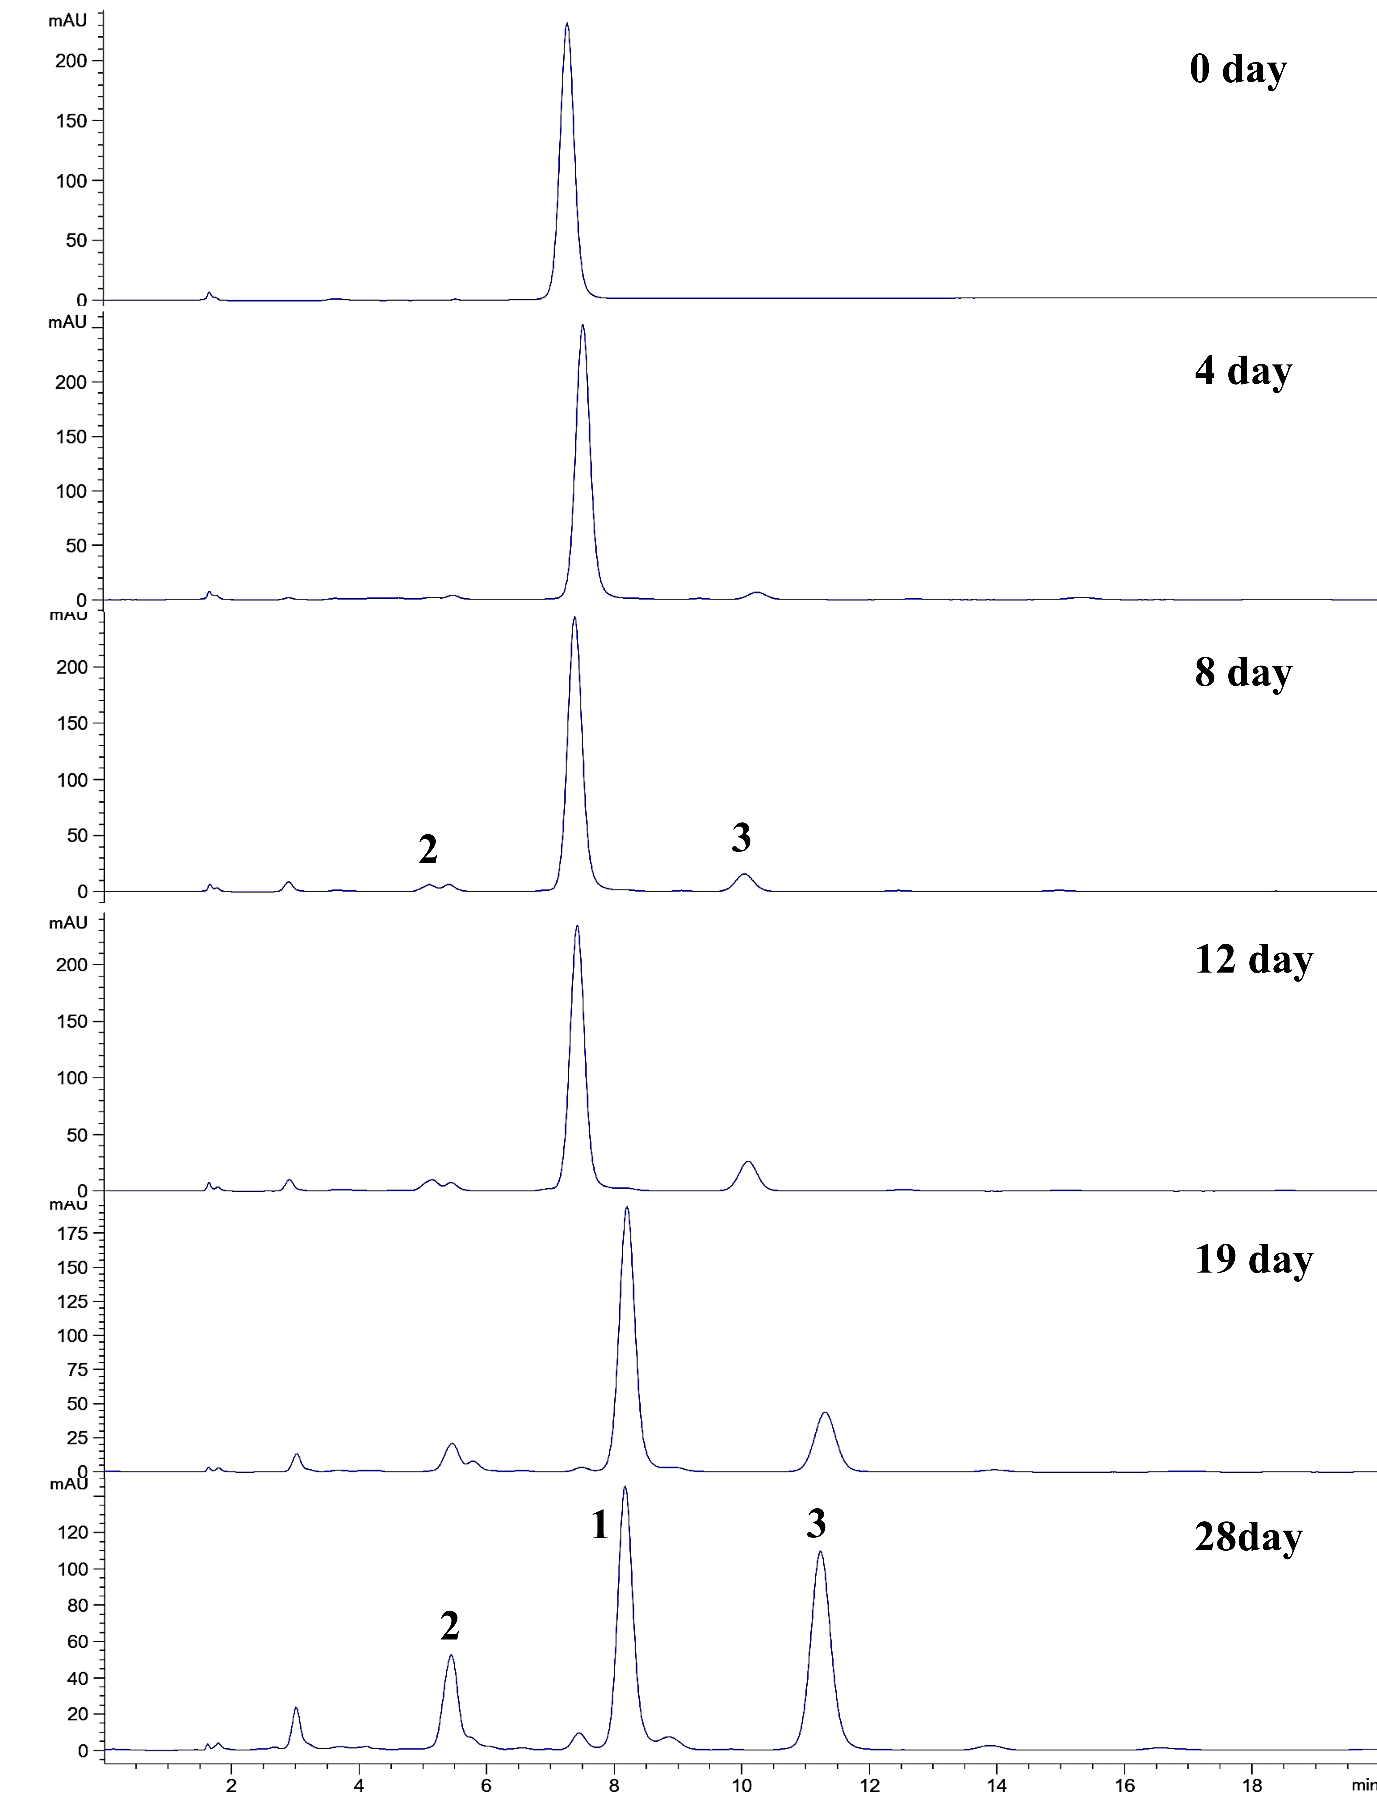
**

**Fig. S1.** HPLC chromatograms of degradation products of andrographolide (**1**) in MeOH at pH 2.0 and 70oC for 0-28 days.

**
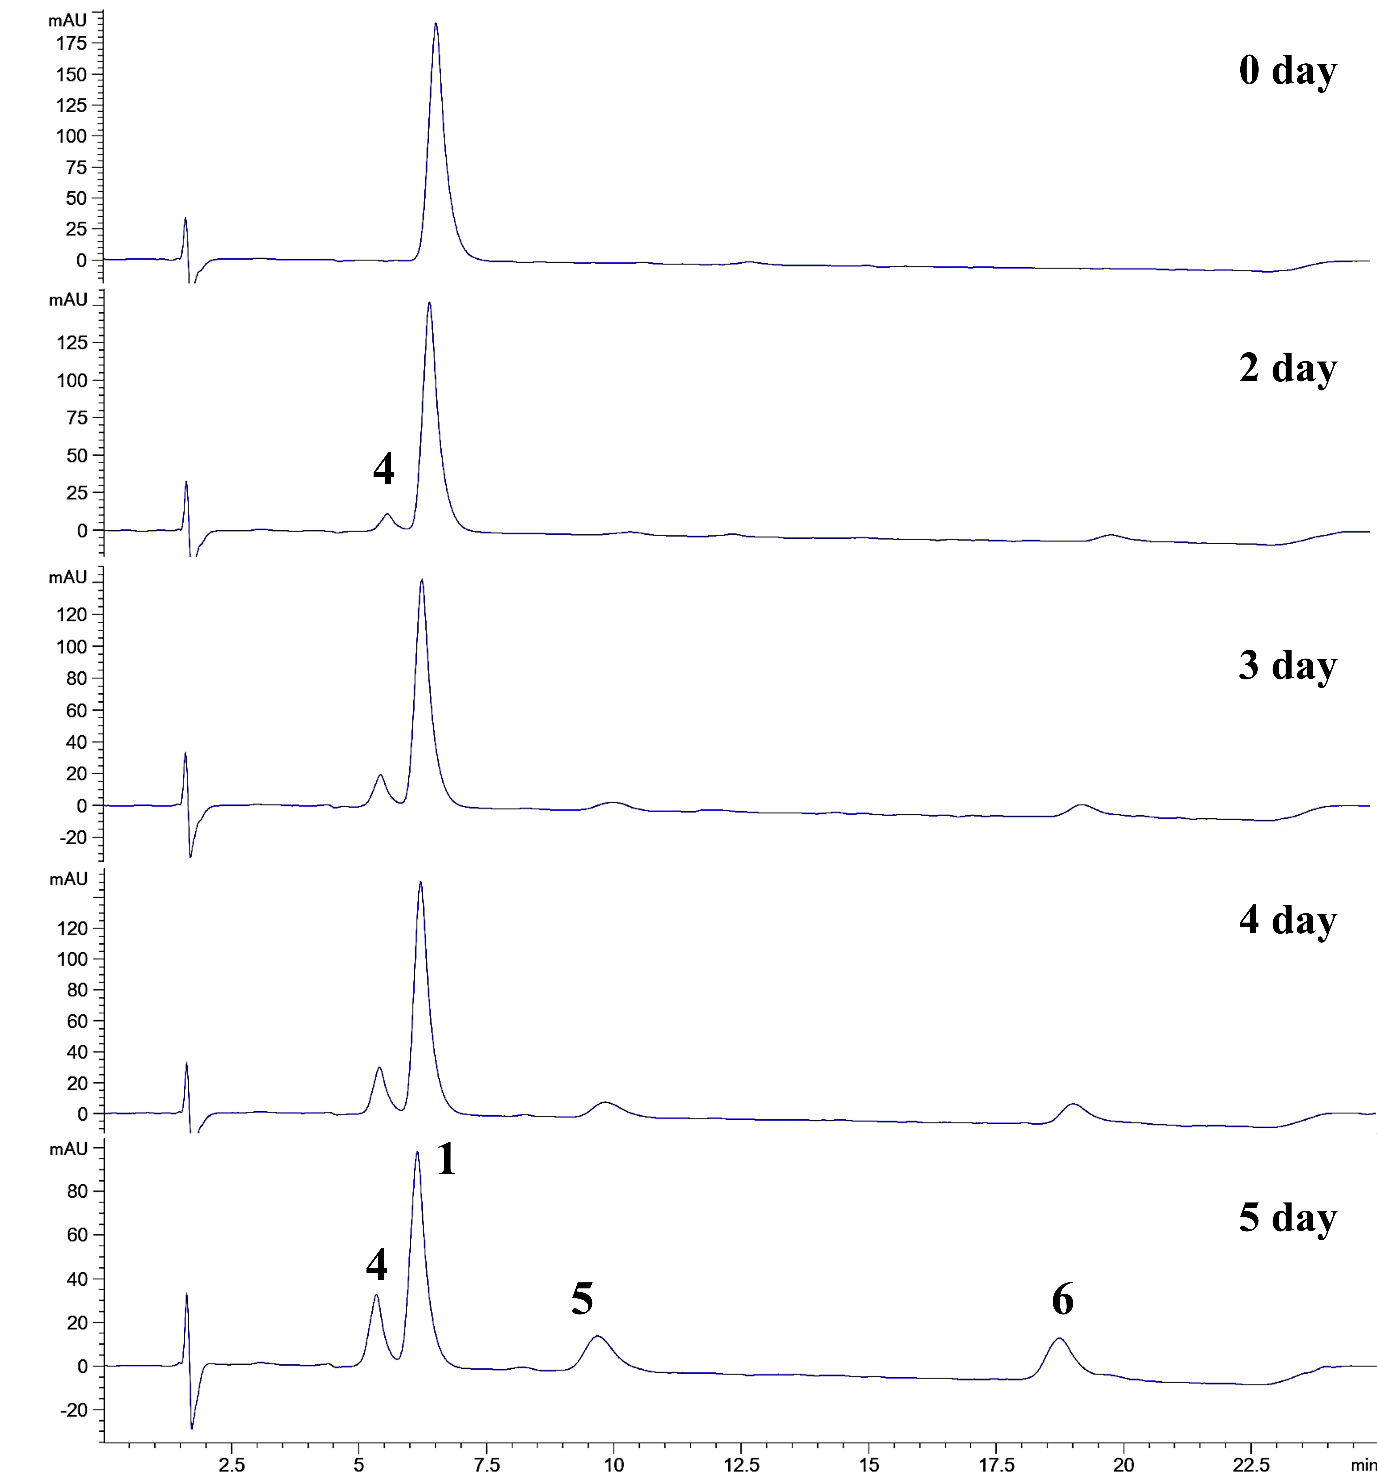
**

**Fig. S2.** HPLC chromatograms of the degradation of andrographolide (**1**) in MeOH at pH 6.0 and 70 oC for 0-5 days.

**
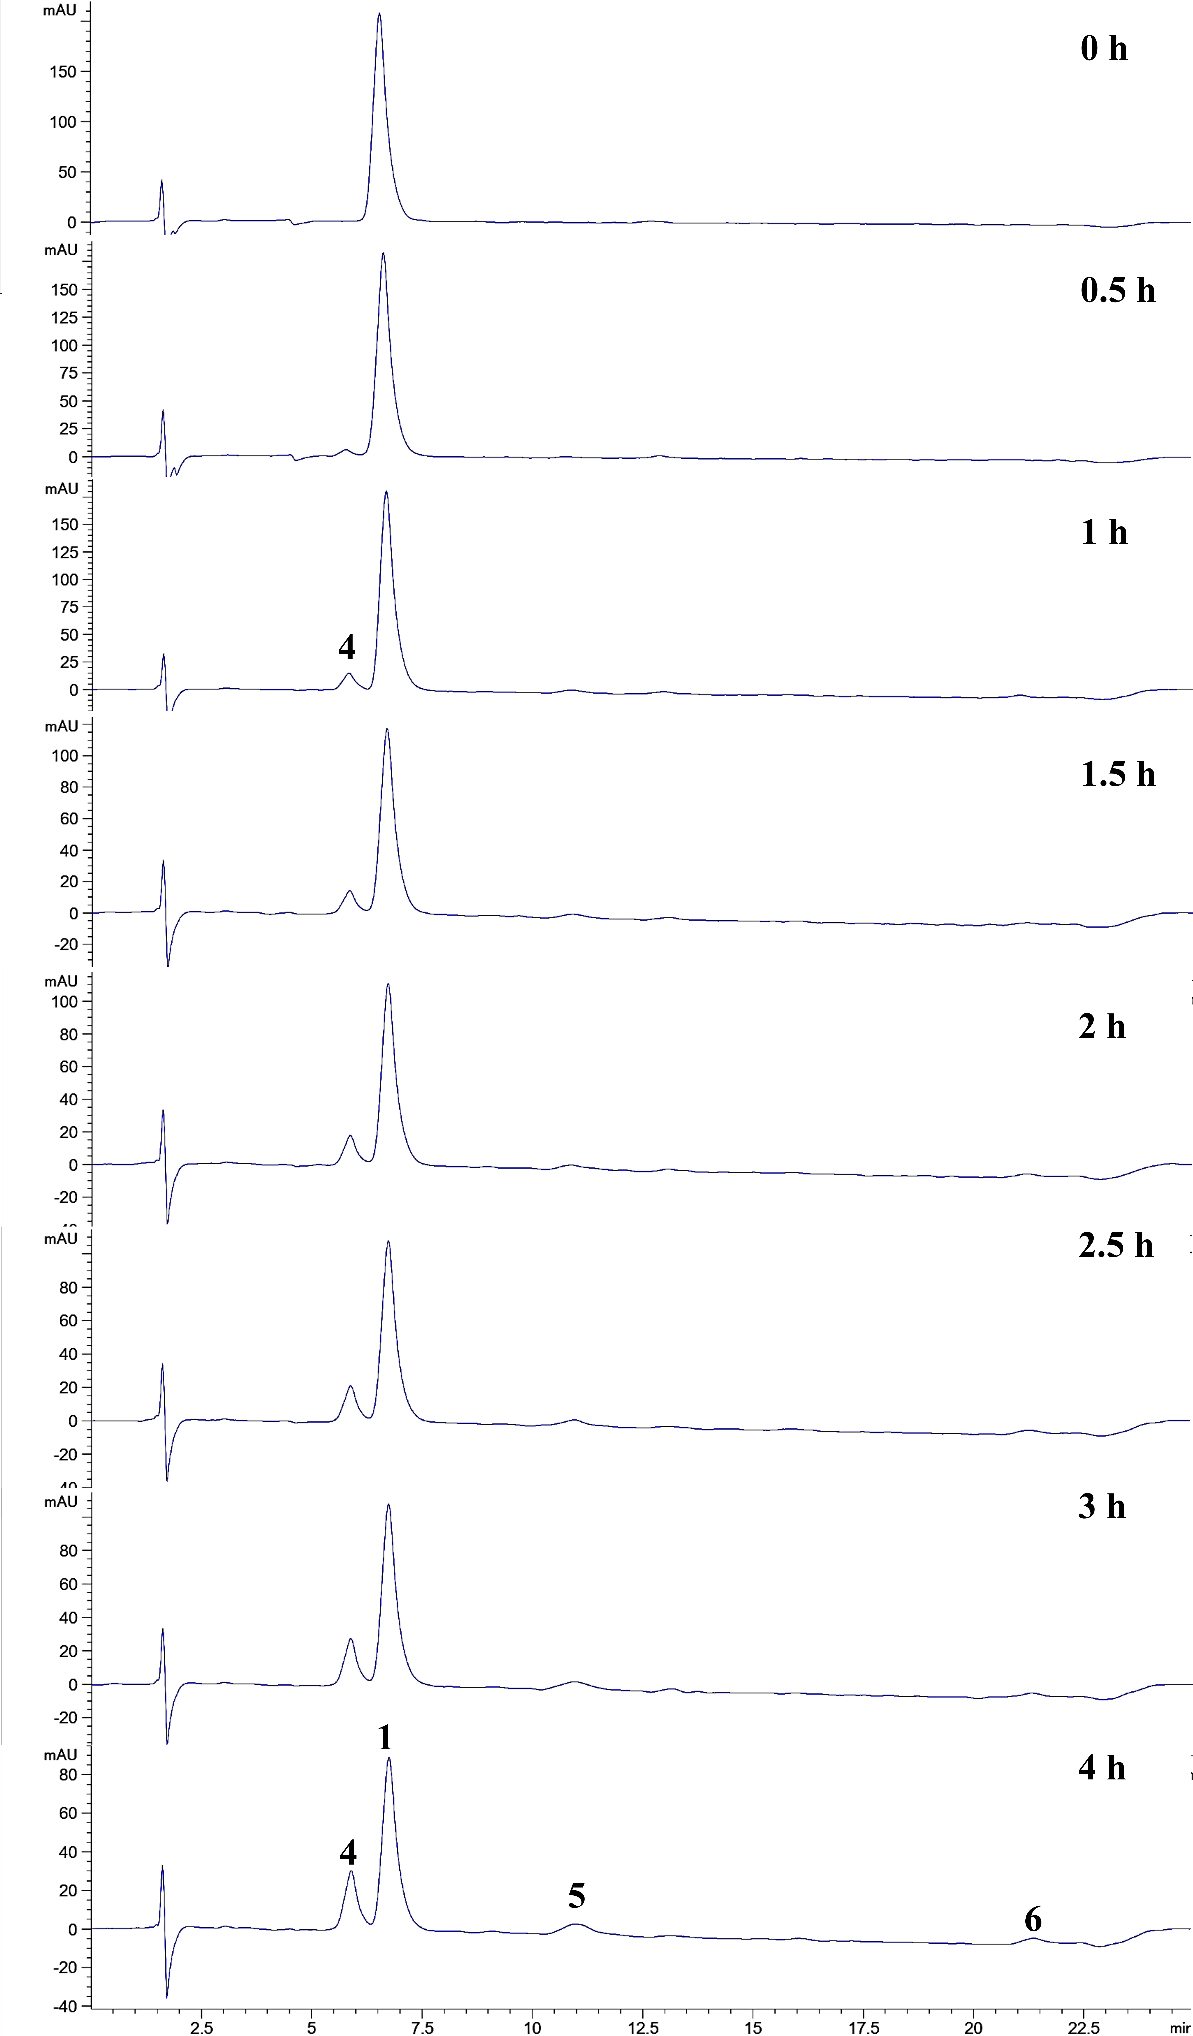
**

**Fig. S3.** HPLC chromatograms of the degradation of andrographolide (**1**) in MeOH at pH 8.0 and 70oC for 0-4 h.

**
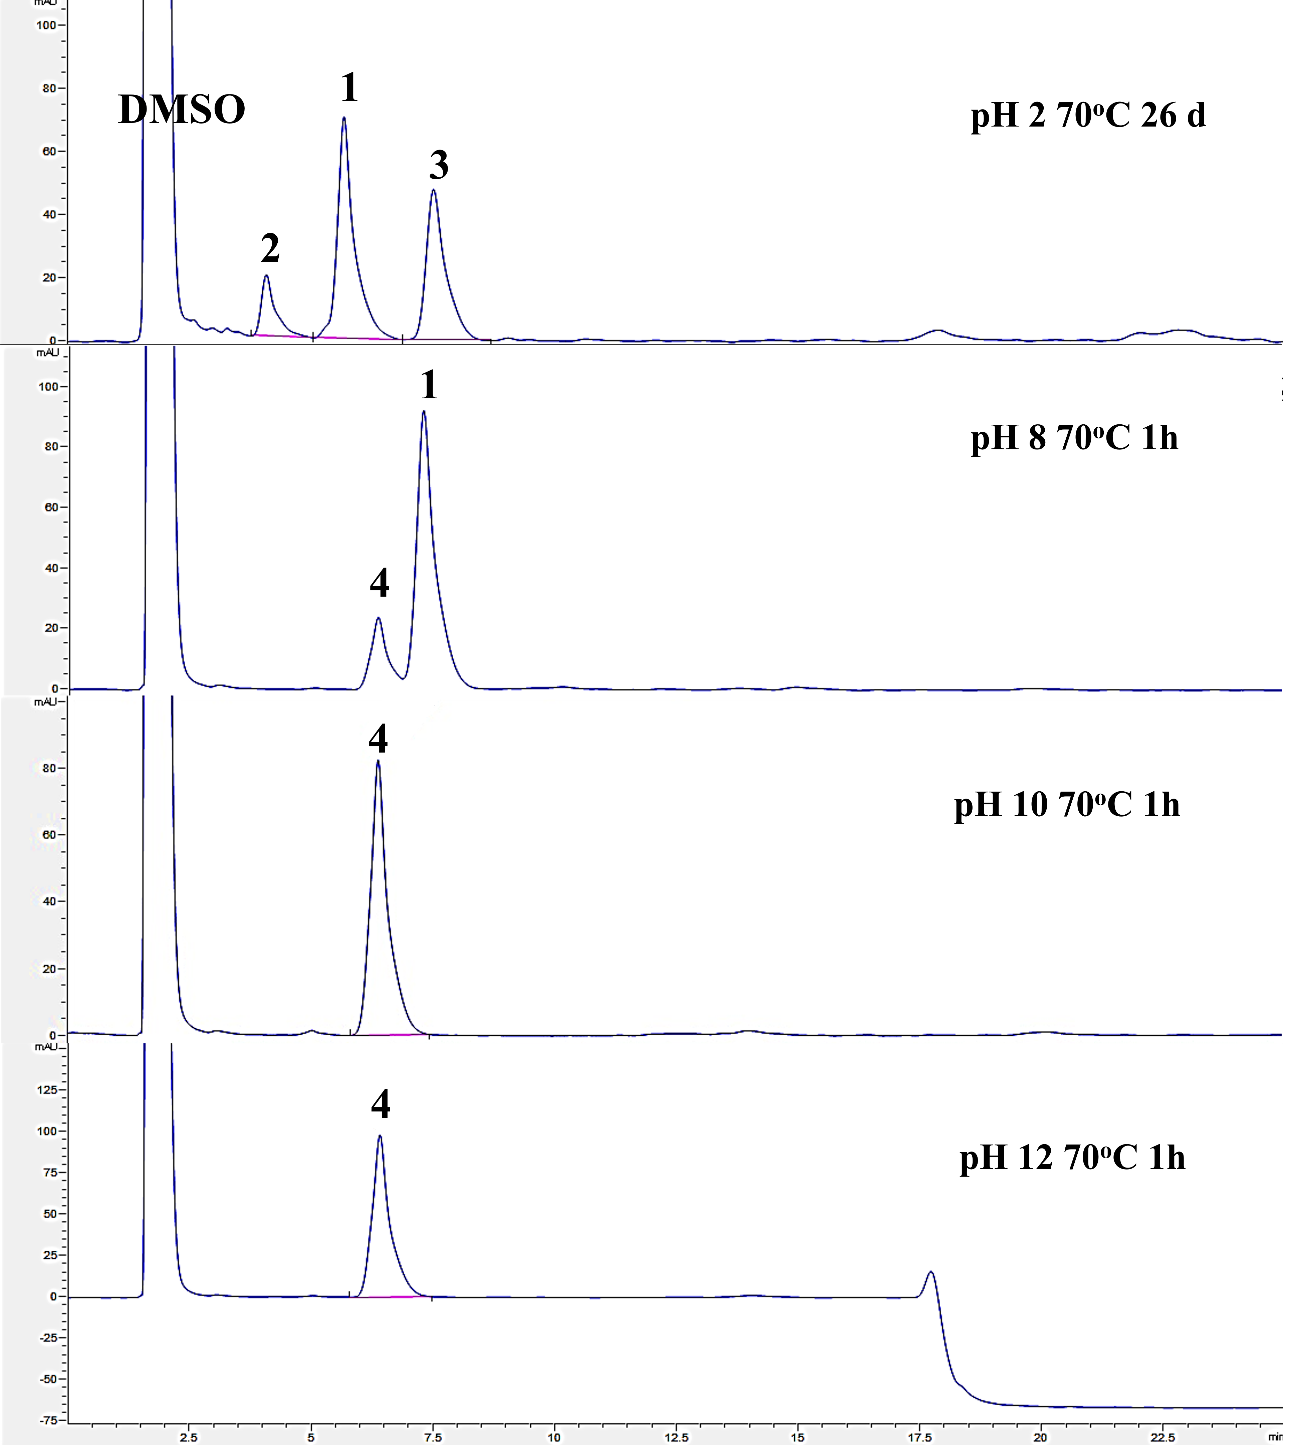
**

**Fig. S4.** HPLC chromatograms of the reactions of andrographolide (**1**) in DMSO at pH 2.0, pH 8.0, pH 10.0, and pH 12.0 at 70oC.

**
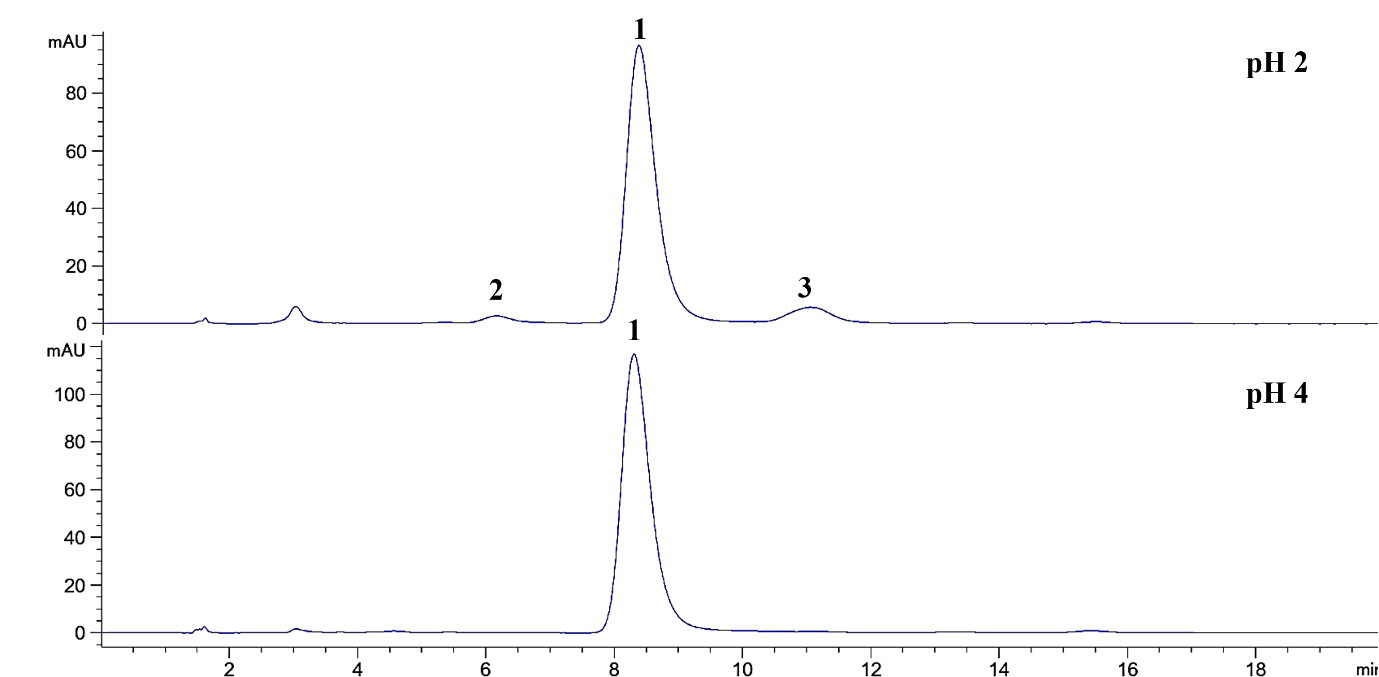
**

**Fig. S5.** HPLC chromatograms of the chemical degradation of andrographolide (**1**) in MeOH at pH 2.0 and pH 4.0 at 70oC for 7 days.

**
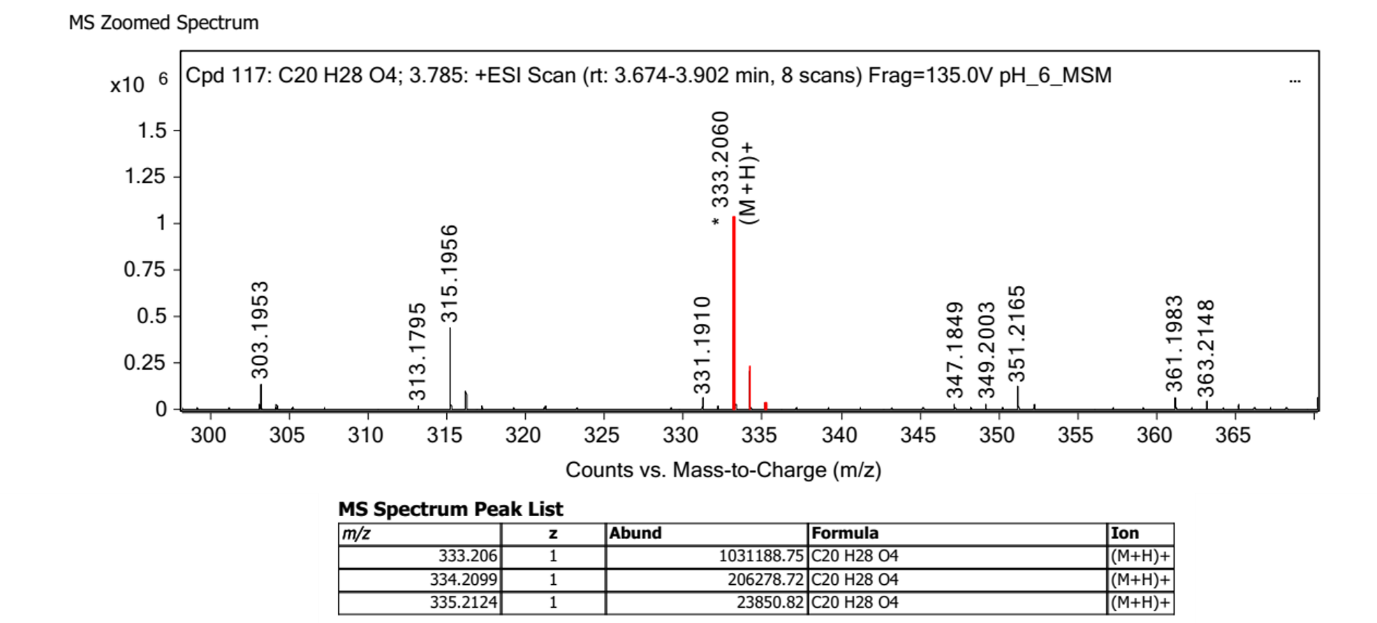
**

**Fig. S6.** LC-MS-QTOF spectra of enol lactone intermediate in the positive ion mode.

**
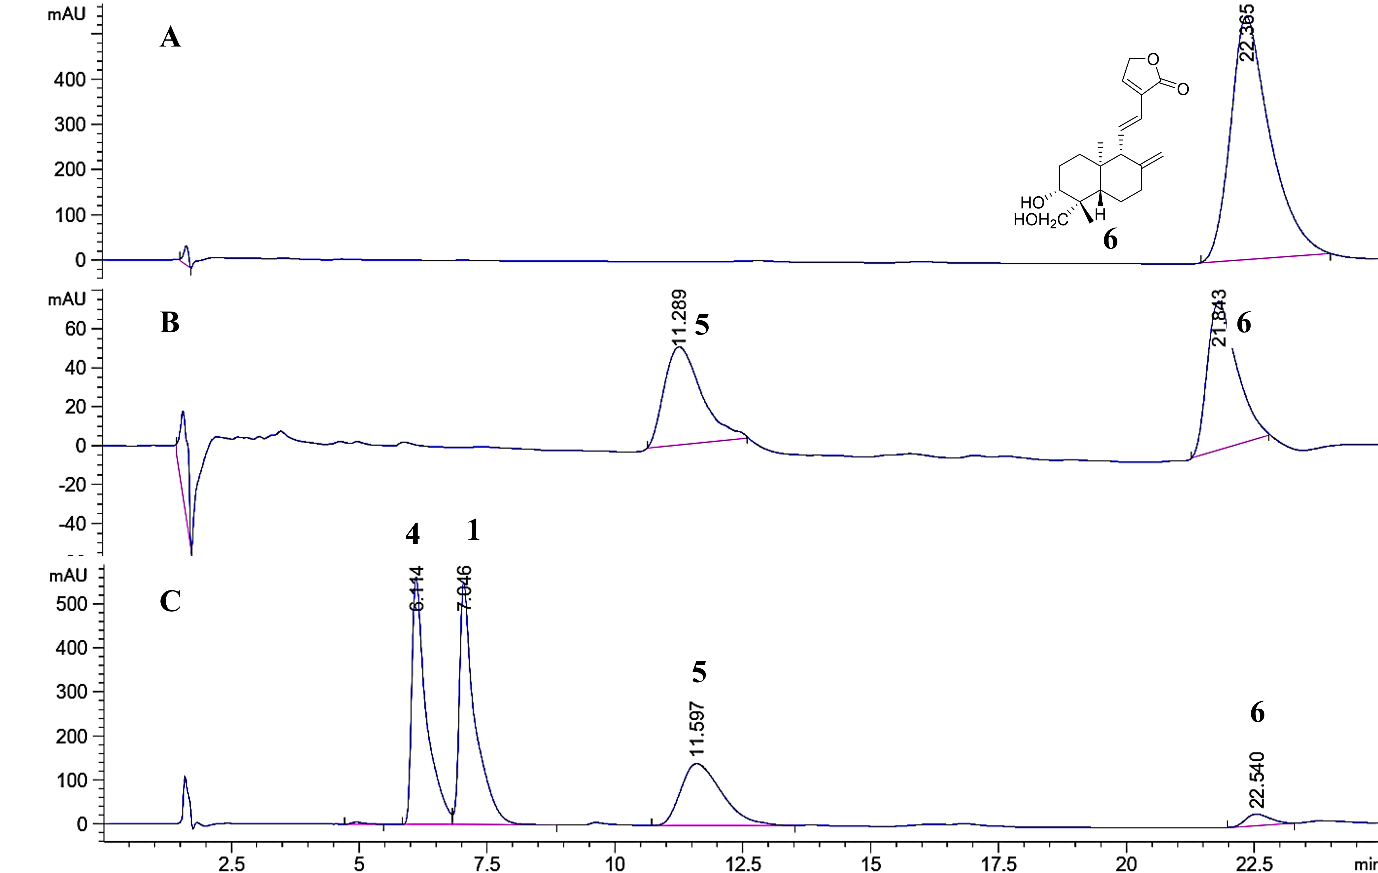
**

**Fig. S7** HPLC chromatograms of (**A**) compound **6**; (**B**) the reaction of **6** in MeOH at pH 8.0 and 70oC for 4 h; (**C**) the reaction of **1** in MeOH pH 8.0 and 70oC for 4 h.

**Fig. S8.** 1H-NMR spectrum of **2** in MeOH-*d*4. at 500 MHz.

**Fig. S9.** 13C NMR spectrum of **2** in MeOH-*d*4 at 500 MHz.


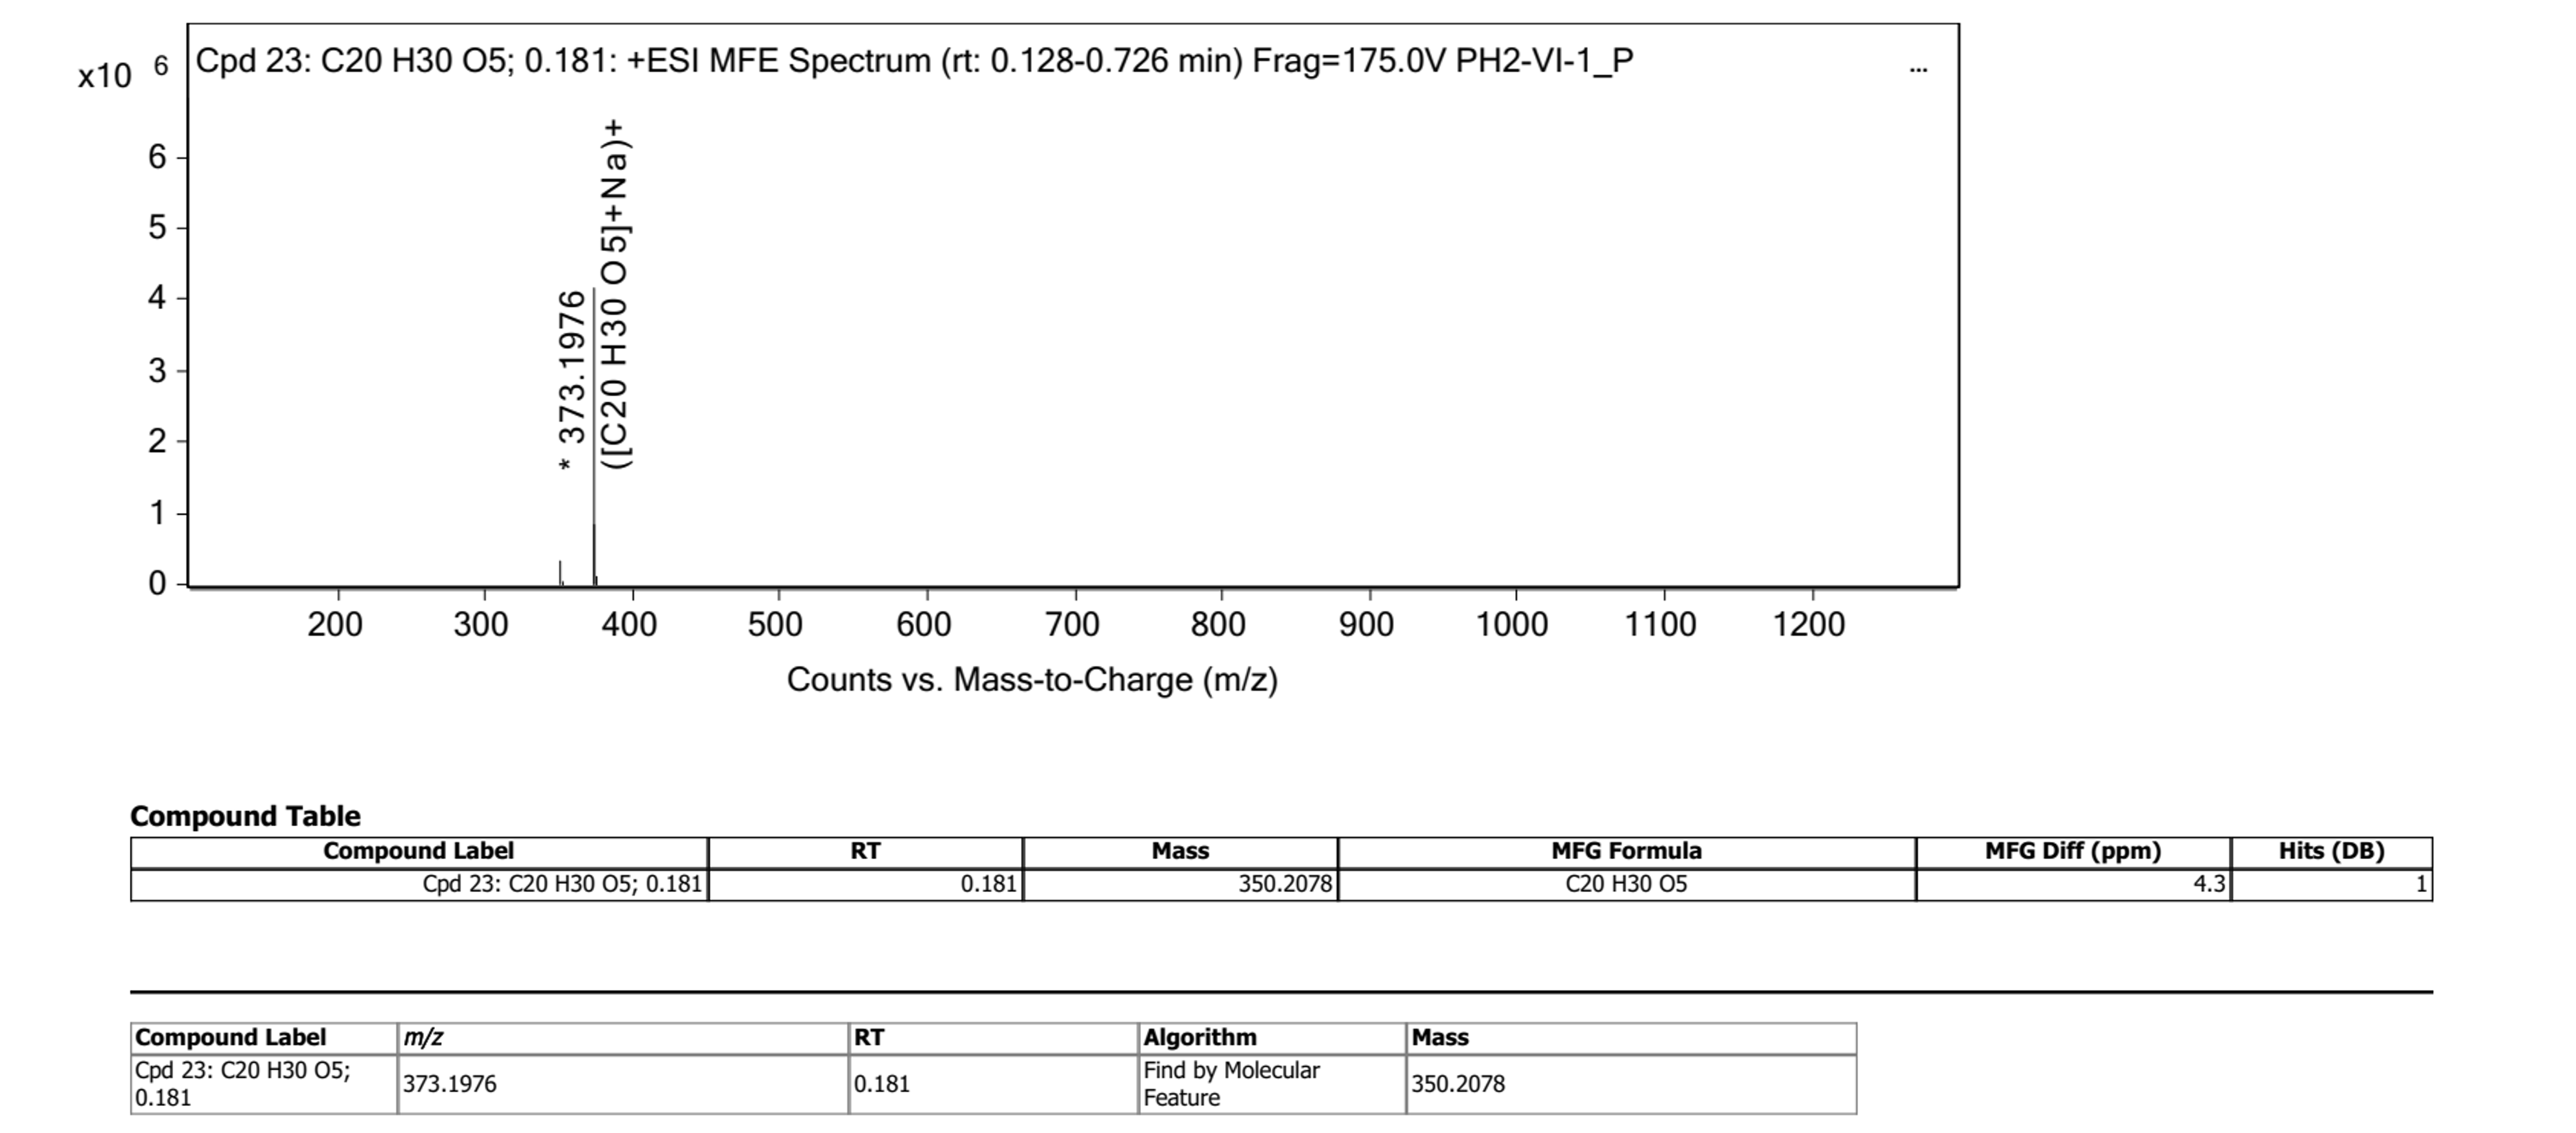


373.1976 [M+Na]+

**Fig. S10.** LC-MS-QTOF positive mode of **2.**

**Fig. S11.** 1H-NMR spectrum of **3** in MeOH-*d*4 at 500 MHz.

**Fig. S12.** 13C NMR spectrum of **3** in MeOH-*d*4 at 500 MHz.


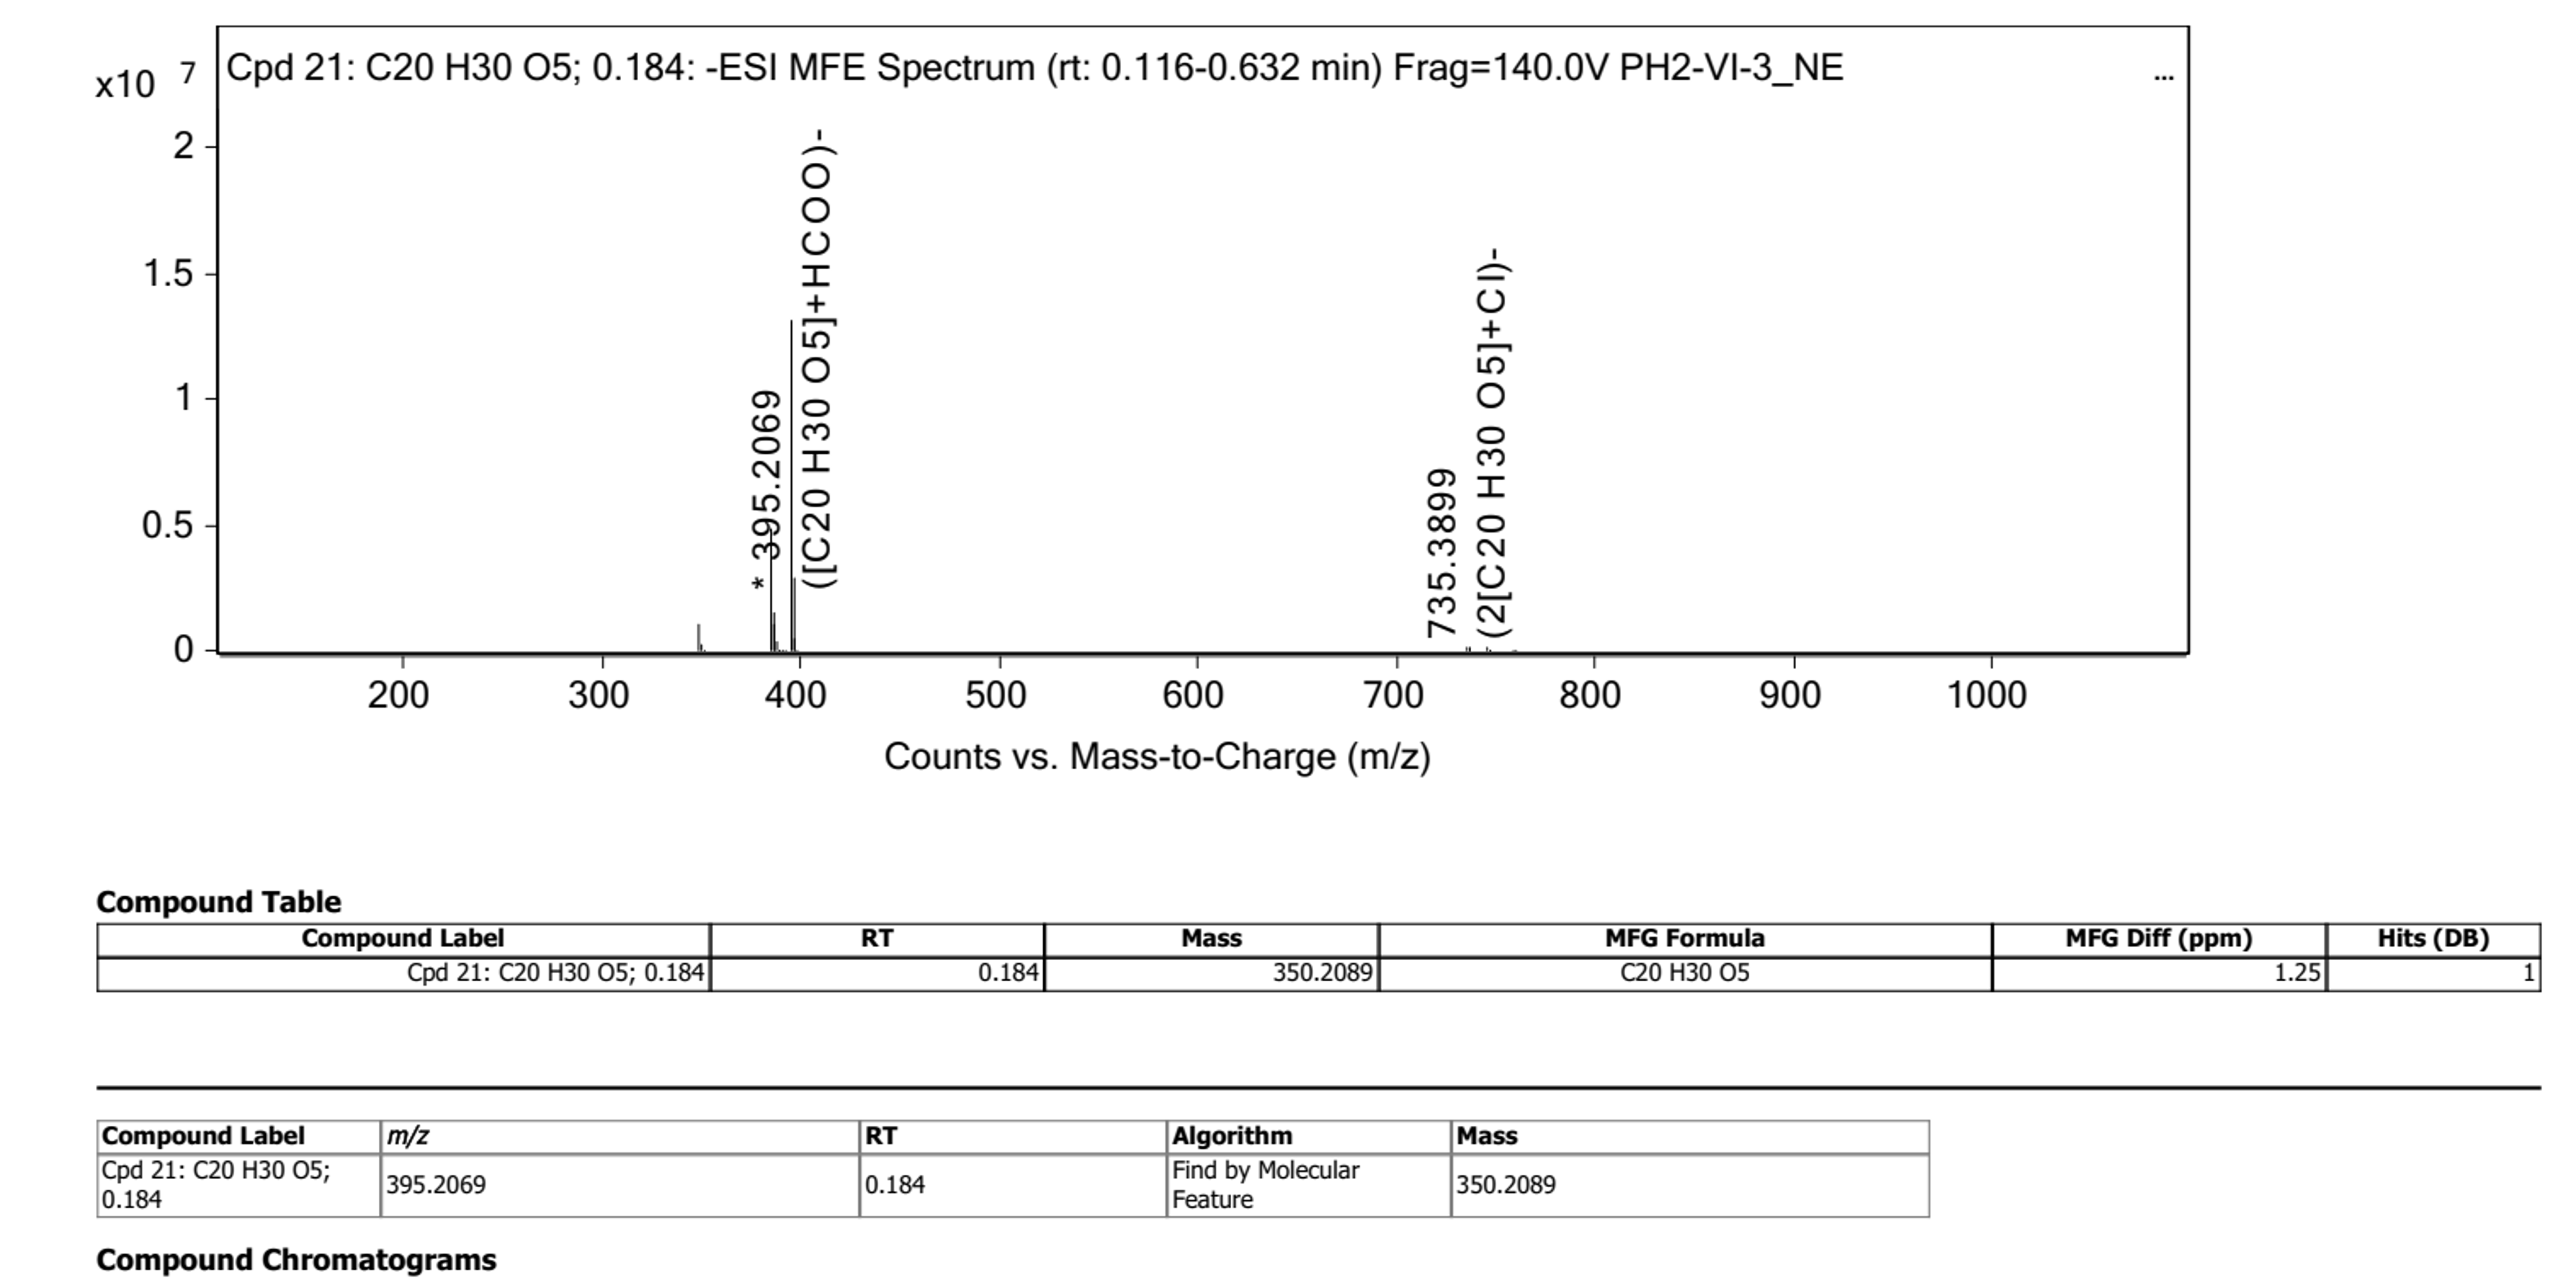


395.2069 [M-HCOO]-

**Fig. S13.** LC-MS-QTOF positive mode of **3.**

**Fig. S14.** 1H-NMR spectrum of **4** in MeOH-*d*4 at 500 MHz.

**Fig. S15.** 13C NMR spectrum of **4** in MeOH-*d*4 at 500 MHz.


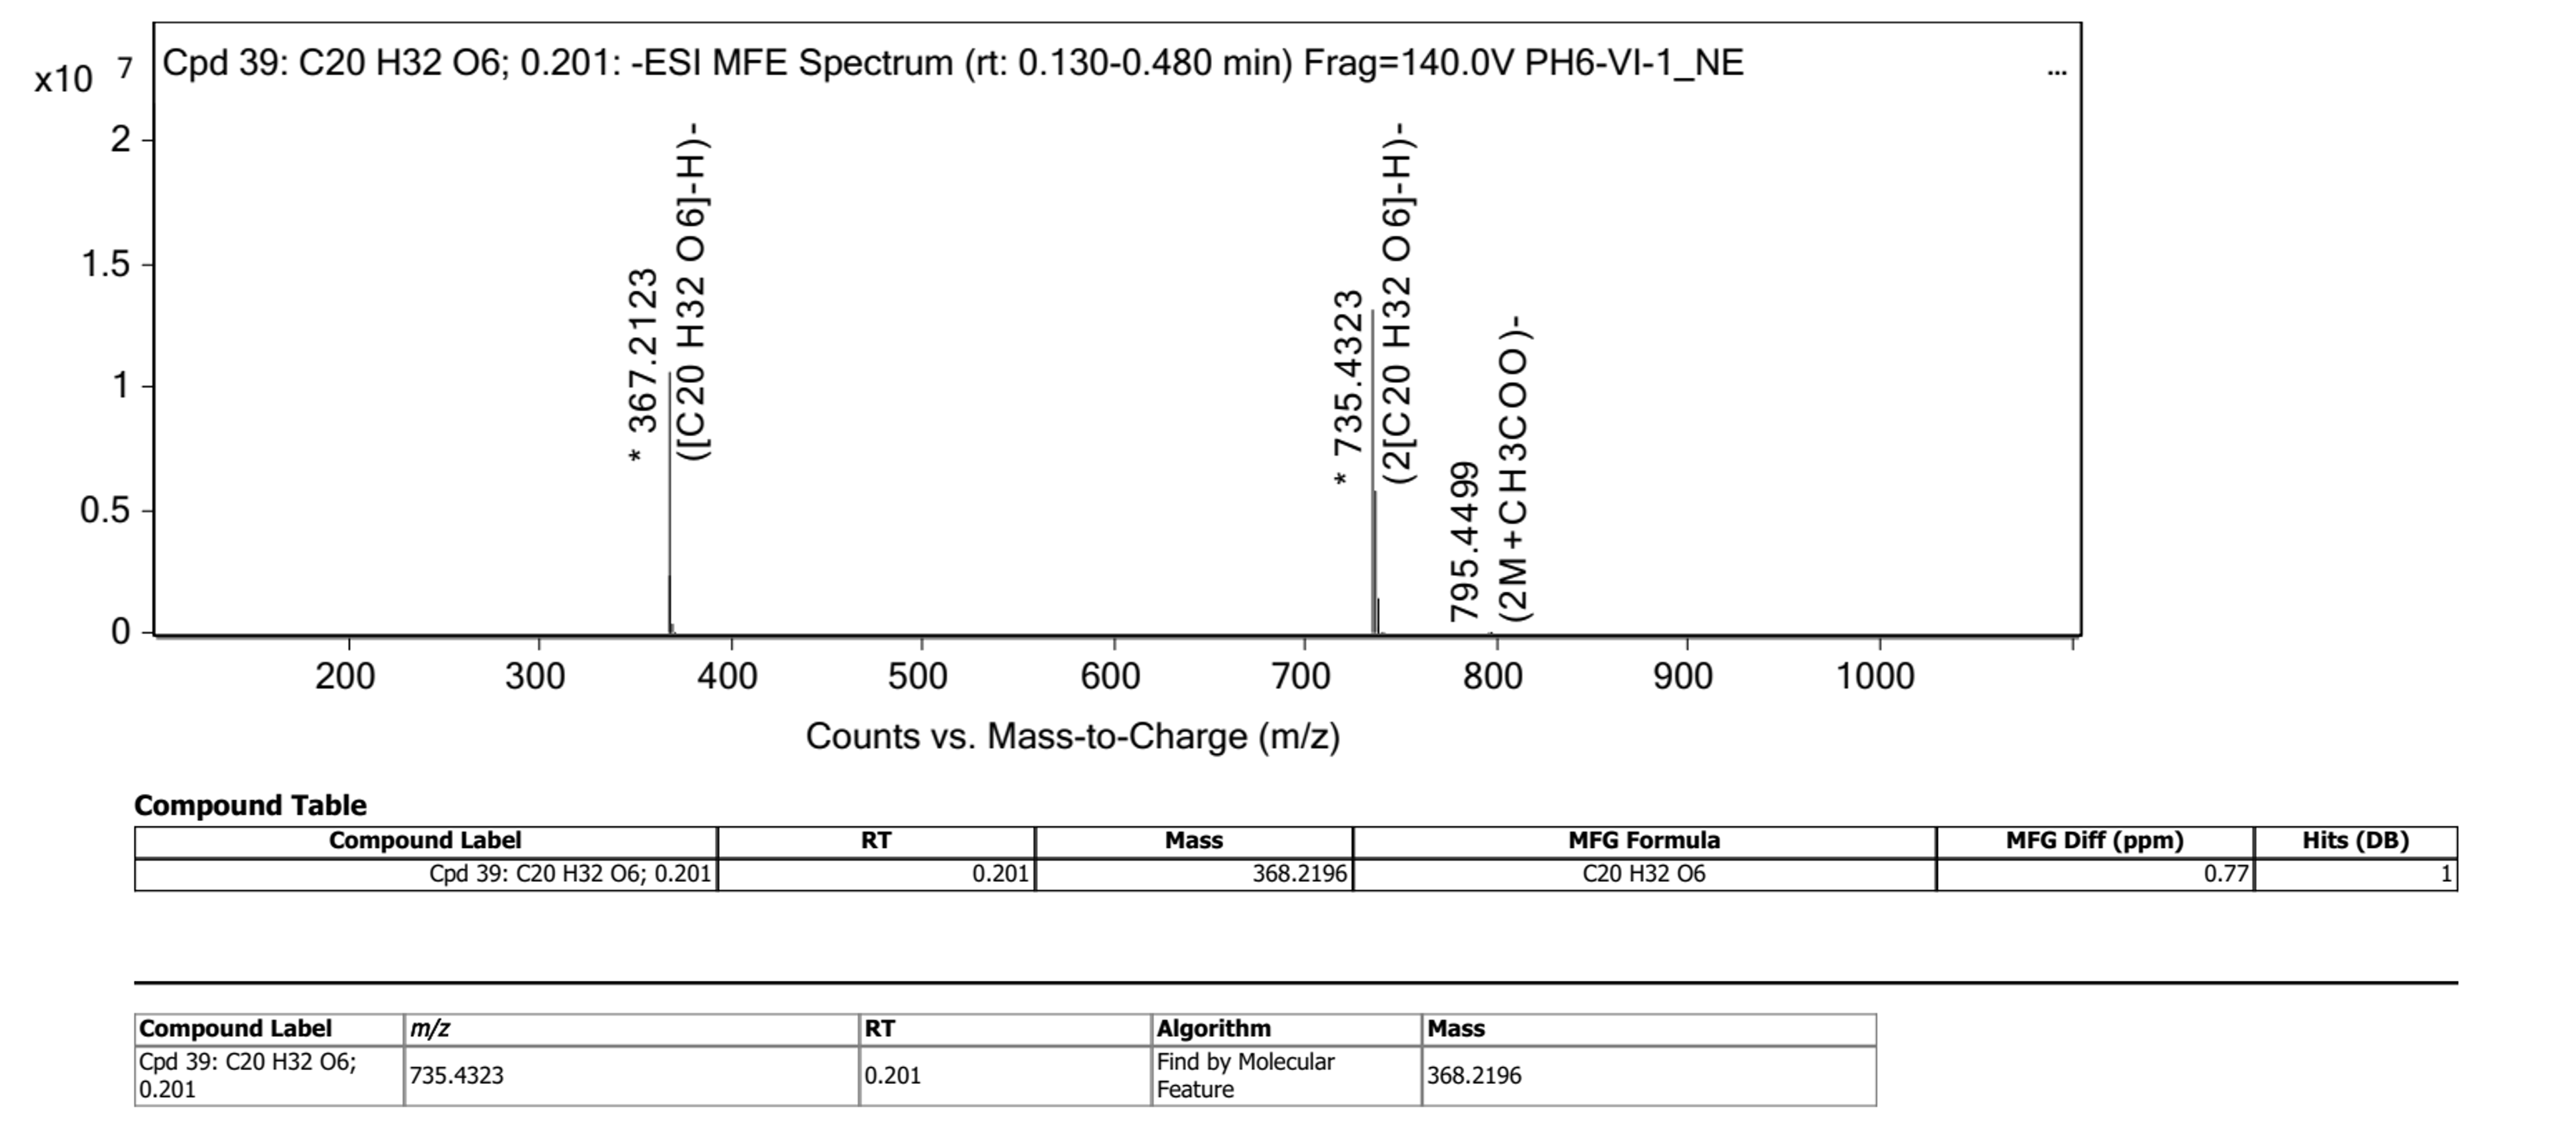


367.2123 [M-H]-

**Fig. S16.** LC-MS-QTOF positive mode of **4.**

**Fig. S17.** 1H-NMR spectrum of **5** in MeOH-*d*4 at 500 MHz

**Fig. S18.** 13C-NMR spectrum of **5** in MeOH-*d*4 at 500 MHz


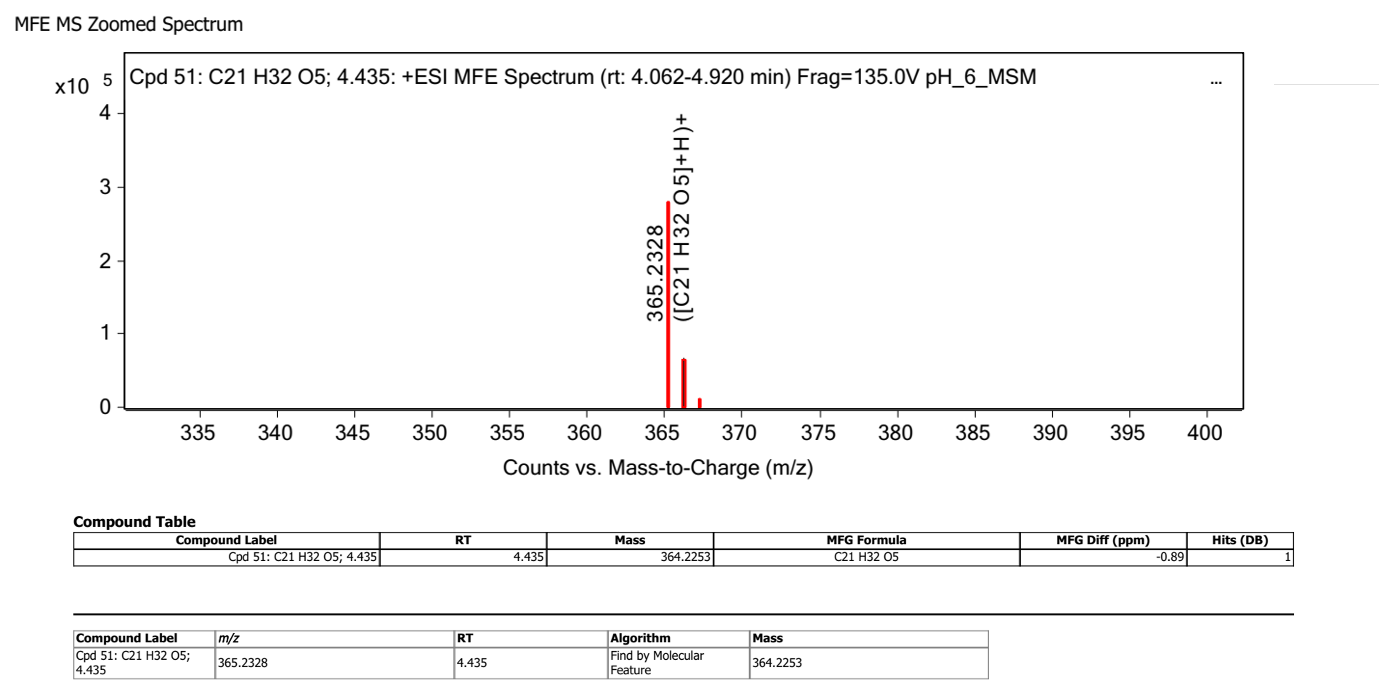


365.2328 [M+H]+

**Fig. S19.** LC-MS-QTOF positive mode of **5.**

**Fig. S20** 1H-NMR spectrum of **6** in MeOH-*d*4 at 500 MHz

**Fig. S21.** 13C-NMR spectrum of **6** in MeOH-*d*4 at 500 MHz


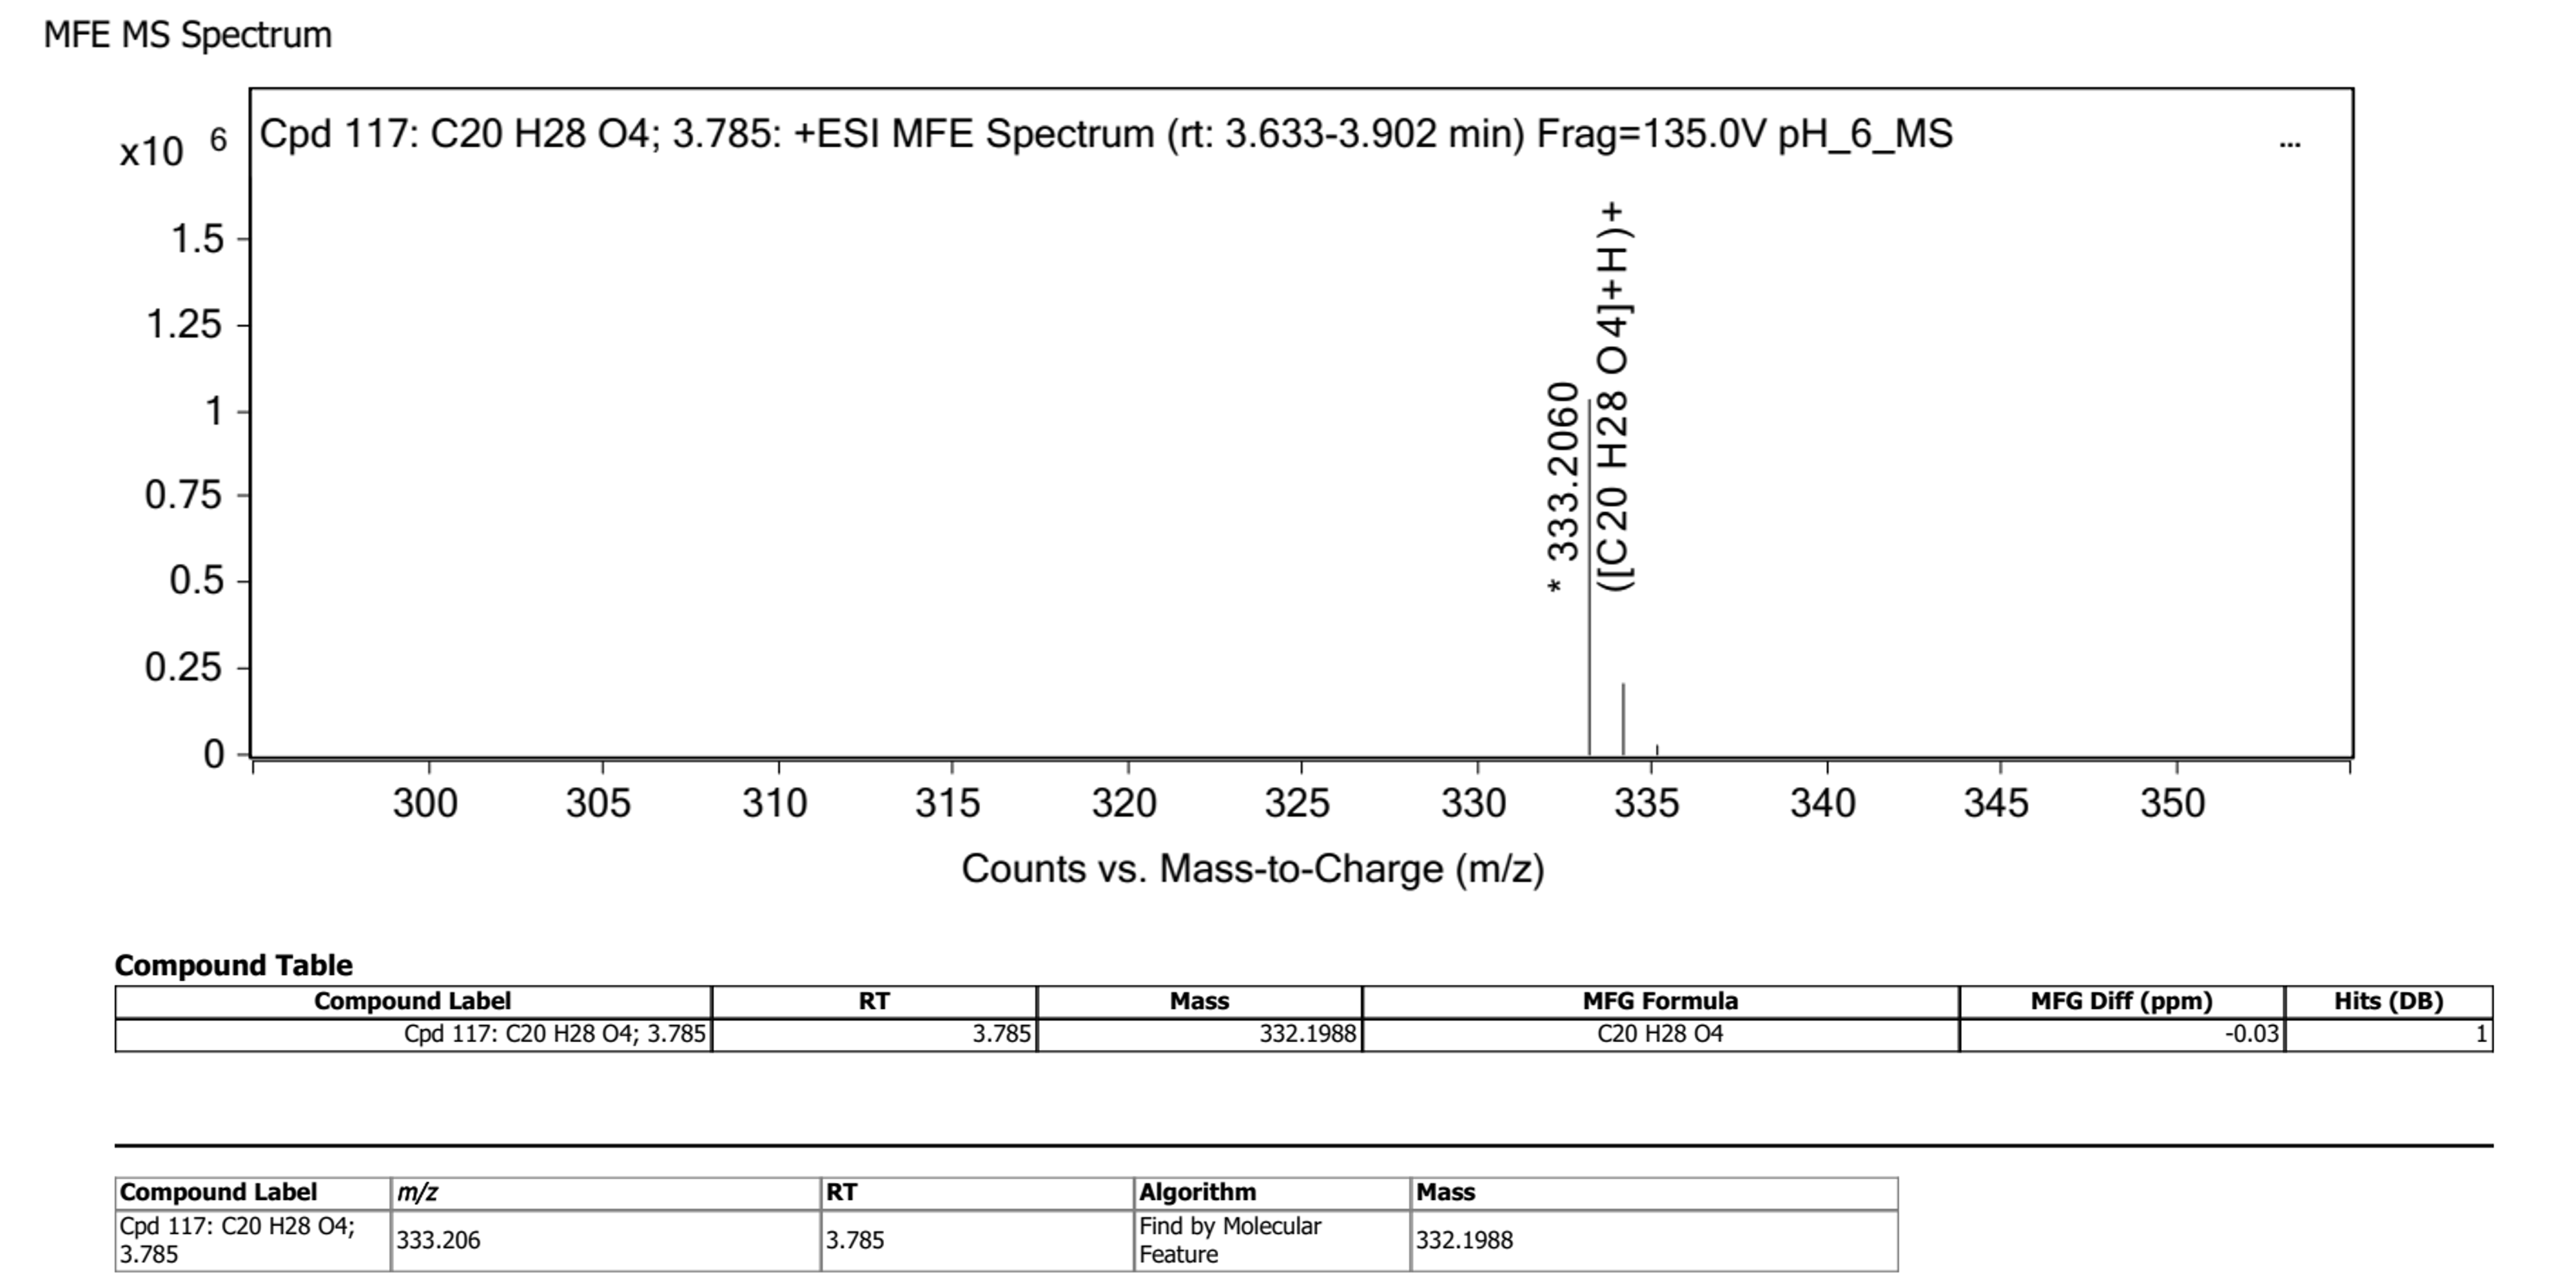


333.2060 [M+H]+

**Fig. S22.** LC-MS-QTOF positive mode of **6.**

**References**

1. Phattanawasin, P., Sotanaphun, U,. Burana-Osot, J. & Piyapolrungroj, N. Isolation and characterization of the acid and base degradation products of andrographolide. *Pharmazie* **73,** 559−562 (2018).

2. Pramanick, S. et al. Andropanolide and isoandrographolide, minor diterpenoids from *Andrographis paniculata*: structure and X-ray crystallographic analysis, *J. Nat. Prod.* **69** 403−405 (2006).

3. Wang, G. Y. et al. Two new diterpenoid lactones isolated from *Andrographis paniculata*. *Chin. J. Nat. Medicines.* **15,** 458−462 (2017).
